# Supplementary material
Source: PubMed Central journal article supplement (PMC10077109)
Supplement: jamapsychiatry-e224812-s001.pdf [file jamapsychiatry-e224812-s001.pdf]

## Supplementary Online Content

Yang T, Wang J, Huang J, Kelly FJ, Li G. Long-term exposure to multiple ambient air pollutants and association with incident depression and anxiety. *JAMA Psychiatry*. Published online February 1, 2023. doi:10.1001/jamapsychiatry.2022.4812

### eMethods

**eTable 1.** Description of Air Pollutants

**eTable 2.** Annual Guidelines for PM<sub>2.5</sub> and NO<sub>2</sub> in 2021 WHO Global Air Quality Guidelines and Standards in Other Countries

**eTable 3.** The Spearman Correlations Between Air Pollutants

**eTable 4.** Censoring Rates for Study Participants According to Categorical Air Pollutants

**eTable 5.** Associations of Incidence of Depression and Anxiety With Individual Air Pollutant

**eTable 6.** Interaction Between PM<sub>2.5</sub>, NO<sub>2</sub>, and NO for Depression and Anxiety in Additive Hazards Models

**eTable 7.** Subgroup Analysis and Effect Modification for the Association of Incidence of Depression and Anxiety With Air Pollution Score

**eTable 8.** Subgroup Analysis and Effect Modification for the Association of Incidence of Depression and Anxiety With PM<sub>2.5</sub>

**eTable 9.** Subgroup Analysis and Effect Modification for the Association of Incidence of Depression and Anxiety With NO<sub>2</sub>

**eTable 10.** Subgroup Analysis and Effect Modification for the Association of Incidence of Depression and Anxiety With NO

**eTable 11.** Associations of Incidence of Depression and Anxiety With Exposure to Air Pollutants by Multiple Imputation

**eTable 12.** Associations of Incidence of Depression and Anxiety With Exposure to Air Pollutants by Further Adjusting for Household Income

**eTable 13.** Associations of Incidence of Depression and Anxiety With Exposure to Air Pollutants by Further Adjusting for Green Space Percentage

**eTable 14.** Associations of Incidence of Depression and Anxiety With Exposure to Air Pollutants by Replacing Townsend Deprivation Index With Income Score and Housing Score

**eTable 15.** Associations of Incidence of Depression and Anxiety With Exposure to Air Pollutants by Avoiding the Second Depression Outcome for the Same Person if Follow-up Anxiety Was Diagnosed First, and Vice Versa

**eTable 16.** Associations of Incidence of Depression and Anxiety With Exposure to Air Pollutants by Excluding Depression and Anxiety Cases Occurred in the First 2 Years of Follow-up

**eTable 17.** Associations of Incidence of Depression and Anxiety With Time-Varying PM<sub>2.5</sub>

**eFigure 1.** Directed Acyclic Graph for the Association Between Air Pollution and Depression or Anxiety

**eFigure 2.** Flow Chart of Participants Included in the Study

**eFigure 3.** Cumulative Survival Curves for Air Pollutants and Incident Depression (A) and Anxiety (B)

This supplementary material has been provided by the authors to give readers additional information about their work.

## **eMethods**

### **Outcome identification**

There were 626 and 623 participants lost to follow up for depression and anxiety outcomes, respectively.

### **Covariates**

Age was categorized into <65 years and  $\geq 65$  years. Race and ethnicity were classified as Asian (Indian, Pakistani, Bangladeshi, or any other Asian background except Chinese), Black, Chinese, multiracial, White, and other ethnic group. Considering the relatively small number of Asian, Black, Chinese, multiracial and other ethnic group, these were synthesized into “Others” in the analysis. Length of time at residence was collected with touchscreen questionnaire and categorized into <10 years and  $\geq 10$  years. Townsend deprivation index is a continuous composite area-level indicator of socioeconomic status and was assigned based on residential postcode, provided directly by the UK Biobank. Education was synthesized into “others” and “university or college degree”. Employment status was categorized into in paid or not (not employed or not in paid). 24-h weighted average noise was calculated with a 5 and 10-decibel (dB) penalty added to evening and night time, respectively. Proximity to major road was indicated by the inverse distance to the nearest major road.

### **Statistical analysis**

The standardized loadings for PM<sub>2.5</sub>, NO<sub>2</sub>, and NO with the first principal component are 0.94, 0.94, and 0.89, respectively.

### **Sensitivity analysis**

Household income was categorized into <£18 000, £18 000–£30 999, £31 000–51 999, >£52 000. Considering the high missing proportion (large than 15%) of household income, we used a new category ‘missing’ to maximize the data. Income score and housing score are single area-level indicator of socioeconomic status, and are calculated in different ways between England, Scotland and Wales. Thus, they were scaled to reduce the difference in calculation in this study. We used green space percentage in 1000-m buffer to indicate proximity to green space given the data available. Similarly, we used median value to impute continuous income score, housing score, and green space percentage in 1000-m buffer.

**eTable 1.** Description of Air Pollutants

|                                           | <b>min</b> | <b>25<sup>th</sup></b> | <b>median</b> | <b>75<sup>th</sup></b> | <b>max</b> | <b>IQR</b> |
|-------------------------------------------|------------|------------------------|---------------|------------------------|------------|------------|
| PM <sub>2.5</sub> (µg/m <sup>3</sup> )    | 8.2        | 9.3                    | 9.9           | 10.6                   | 21.3       | 1.3        |
| PM <sub>2.5-10</sub> (µg/m <sup>3</sup> ) | 5.6        | 5.8                    | 6.1           | 6.6                    | 12.8       | 0.8        |
| NO <sub>2</sub> (µg/m <sup>3</sup> )      | 12.9       | 21.3                   | 26.0          | 31.1                   | 108.5      | 9.9        |
| NO (µg/m <sup>3</sup> )                   | 0          | 11.6                   | 15.9          | 20.6                   | 160.1      | 9.0        |
| Air pollution score                       | -1.7       | -0.6                   | -0.1          | 0.5                    | 12.8       | 1.1        |

PM<sub>2.5</sub>, particulate matter with aerodynamic diameter  $\leq 2.5$  µm; PM<sub>2.5-10</sub>, particulate matter with aerodynamic diameter between 2.5 and 10 µm; NO<sub>2</sub>, nitrogen dioxide; NO, nitric oxide.

**eTable 2.** Annual Guidelines for PM<sub>2.5</sub> and NO<sub>2</sub> in 2021 WHO Global Air Quality Guidelines and Standards in Other Countries

| <b>Air pollutants</b>                            | <b>2021AQGs</b> | <b>UK</b>                             | <b>US</b>                      | <b>European Obligations</b>              |
|--------------------------------------------------|-----------------|---------------------------------------|--------------------------------|------------------------------------------|
| <b>PM<sub>2.5</sub></b> (µg/m <sup>3</sup> )     | 5               | 20 (except Scotland)<br>10 (Scotland) | 12 (primary)<br>15 (secondary) | 25 (Stage 1 Limit)<br>20 (Stage 2 Limit) |
| <b>NO<sub>2</sub></b> (µg/m <sup>3</sup> or ppb) | 10 <sup>a</sup> | 40 <sup>a</sup>                       | 53 <sup>b</sup>                | 40 <sup>a</sup>                          |

AQGs, air quality guidelines; PM<sub>2.5</sub>, particulate matter with aerodynamic diameter ≤2.5 µm; NO<sub>2</sub>, nitrogen dioxide. <sup>a</sup>: µg/m<sup>3</sup>, <sup>b</sup>: ppb

**eTable 3.** The Spearman Correlations Between Air Pollutants

|                      | <b>PM<sub>2.5</sub></b> | <b>PM<sub>2.5-10</sub></b> | <b>NO<sub>2</sub></b> | <b>NO</b> |
|----------------------|-------------------------|----------------------------|-----------------------|-----------|
| PM <sub>2.5</sub>    | 1.00                    |                            |                       |           |
| PM <sub>2.5-10</sub> | 0.28*                   | 1.00                       |                       |           |
| NO <sub>2</sub>      | 0.85*                   | 0.29*                      | 1.00                  |           |
| NO                   | 0.75*                   | 0.25*                      | 0.68*                 | 1.00      |

PM<sub>2.5</sub>, particulate matter with aerodynamic diameter  $\leq 2.5$   $\mu\text{m}$ ; PM<sub>2.5-10</sub>, particulate matter with aerodynamic diameter between 2.5 and 10  $\mu\text{m}$ ; NO<sub>2</sub>, nitrogen dioxide; NO, nitric oxide.

\*Statistically significant correlation ( $p < 0.05$ ).

**eTable 4.** Censoring Rates for Study Participants According to Categorical Air Pollutants

|                   | <b>PM<sub>2.5</sub></b> | <b>PM<sub>2.5-10</sub></b> | <b>NO<sub>2</sub></b> | <b>NO</b> | <b>Air pollution score</b> |
|-------------------|-------------------------|----------------------------|-----------------------|-----------|----------------------------|
| <b>Depression</b> |                         |                            |                       |           |                            |
| Quartile 1        | 97.21%                  | 96.78%                     | 97.18%                | 97.14%    | 97.21%                     |
| Quartile 2        | 96.84%                  | 96.63%                     | 96.71%                | 96.80%    | 96.86%                     |
| Quartile 3        | 96.48%                  | 96.56%                     | 96.42%                | 96.50%    | 96.40%                     |
| Quartile 4        | 95.99%                  | 96.54%                     | 96.19%                | 96.07%    | 96.03%                     |
| <b>Anxiety</b>    |                         |                            |                       |           |                            |
| Quartile 1        | 96.39%                  | 96.06%                     | 96.30%                | 96.40%    | 96.40%                     |
| Quartile 2        | 96.04%                  | 95.81%                     | 95.98%                | 96.00%    | 96.01%                     |
| Quartile 3        | 95.76%                  | 95.94%                     | 95.66%                | 95.68%    | 95.70%                     |
| Quartile 4        | 95.55%                  | 95.93%                     | 95.78%                | 95.64%    | 95.62%                     |

PM<sub>2.5</sub>, particulate matter with aerodynamic diameter  $\leq 2.5$   $\mu\text{m}$ ; PM<sub>2.5-10</sub>, particulate matter with aerodynamic diameter between 2.5 and 10  $\mu\text{m}$ ; NO<sub>2</sub>, nitrogen dioxide; NO, nitric oxide.

**eTable 5.** Associations of Incidence of Depression and Anxiety With Individual Air Pollutant

|                   | PM <sub>2.5</sub>              |                                |                                |                                | PM <sub>2.5-10</sub>        |                                |                                |                                | NO <sub>2</sub>                |                                |                                |                                | NO                             |                                |                             |                                |
|-------------------|--------------------------------|--------------------------------|--------------------------------|--------------------------------|-----------------------------|--------------------------------|--------------------------------|--------------------------------|--------------------------------|--------------------------------|--------------------------------|--------------------------------|--------------------------------|--------------------------------|-----------------------------|--------------------------------|
|                   | HR<br>(95%<br>CI) <sup>a</sup> | <i>P</i><br>value <sup>a</sup> | HR<br>(95%<br>CI) <sup>b</sup> | <i>P</i><br>value <sup>b</sup> | HR<br>(95% CI) <sup>a</sup> | <i>P</i><br>value <sup>a</sup> | HR<br>(95%<br>CI) <sup>b</sup> | <i>P</i><br>value <sup>b</sup> | HR<br>(95%<br>CI) <sup>a</sup> | <i>P</i><br>value <sup>a</sup> | HR<br>(95%<br>CI) <sup>b</sup> | <i>P</i><br>value <sup>b</sup> | HR<br>(95%<br>CI) <sup>a</sup> | <i>P</i><br>value <sup>a</sup> | HR<br>(95% CI) <sup>b</sup> | <i>P</i><br>value <sup>b</sup> |
| <b>Depression</b> |                                |                                |                                |                                |                             |                                |                                |                                |                                |                                |                                |                                |                                |                                |                             |                                |
| Q1                | ref                            | /                              | ref                            | /                              | ref                         | /                              | ref                            | /                              | ref                            | /                              | ref                            | /                              | ref                            | /                              | ref                         | /                              |
| Q2                | 1.13<br>(1.08,<br>1.19)        | <0.001                         | 1.09<br>(1.03,<br>1.14)        | 0.002                          | 1.04 (0.99,<br>1.10)        | 0.081                          | 1.01<br>(0.96,<br>1.06)        | 0.707                          | 1.17<br>(1.11,<br>1.23)        | <0.001                         | 1.11<br>(1.06,<br>1.17)        | <0.001                         | 1.12<br>(1.06,<br>1.18)        | <0.001                         | 1.07<br>(1.02,<br>1.13)     | 0.006                          |
| Q3                | 1.26<br>(1.20,<br>1.33)        | <0.001                         | 1.14<br>(1.08,<br>1.20)        | <0.001                         | 1.09 (1.04,<br>1.15)        | <0.001                         | 1.01<br>(0.96,<br>1.07)        | 0.567                          | 1.29<br>(1.22,<br>1.36)        | <0.001                         | 1.15<br>(1.09,<br>1.22)        | <0.001                         | 1.21<br>(1.15,<br>1.27)        | <0.001                         | 1.11<br>(1.06,<br>1.17)     | <0.001                         |
| Q4                | 1.42<br>(1.34,<br>1.49)        | <0.001                         | 1.15<br>(1.08,<br>1.21)        | <0.001                         | 1.10 (1.04,<br>1.15)        | <0.001                         | 1.01<br>(0.95,<br>1.06)        | 0.804                          | 1.45<br>(1.37,<br>1.53)        | <0.001                         | 1.14<br>(1.07,<br>1.21)        | <0.001                         | 1.33<br>(1.27,<br>1.40)        | <0.001                         | 1.12<br>(1.06,<br>1.18)     | <0.001                         |
| <b>Anxiety</b>    |                                |                                |                                |                                |                             |                                |                                |                                |                                |                                |                                |                                |                                |                                |                             |                                |
| Q1                | ref                            | /                              | ref                            | /                              | ref                         | /                              | ref                            | /                              | ref                            | /                              | ref                            | /                              | ref                            | /                              | ref                         | /                              |
| Q2                | 1.11<br>(1.06,<br>1.17)        | <0.001                         | 1.09<br>(1.04,<br>1.14)        | <0.001                         | 1.03 (0.99,<br>1.08)        | 0.145                          | 1.02<br>(0.97,<br>1.06)        | 0.478                          | 1.09<br>(1.04,<br>1.14)        | <0.001                         | 1.06<br>(1.01,<br>1.11)        | 0.018                          | 1.11<br>(1.06,<br>1.16)        | <0.001                         | 1.09<br>(1.04,<br>1.14)     | <0.001                         |
| Q3                | 1.18<br>(1.13,<br>1.24)        | <0.001                         | 1.11<br>(1.06,<br>1.17)        | <0.001                         | 1.05 (1.00,<br>1.10)        | 0.037                          | 1.01<br>(0.96,<br>1.06)        | 0.752                          | 1.18<br>(1.12,<br>1.23)        | <0.001                         | 1.10<br>(1.05,<br>1.15)        | <0.001                         | 1.19<br>(1.13,<br>1.24)        | <0.001                         | 1.13<br>(1.08,<br>1.18)     | <0.001                         |
| Q4                | 1.25<br>(1.19,<br>1.31)        | <0.001                         | 1.11<br>(1.05,<br>1.16)        | <0.001                         | 1.08 (1.03,<br>1.13)        | <0.001                         | 1.03<br>(0.98,<br>1.08)        | 0.229                          | 1.24<br>(1.18,<br>1.30)        | <0.001                         | 1.08<br>(1.03,<br>1.15)        | 0.004                          | 1.20<br>(1.15,<br>1.26)        | <0.001                         | 1.08<br>(1.03,<br>1.14)     | 0.003                          |

<sup>a</sup> Models were adjusted for age, sex and assessment centre.

<sup>b</sup> Models were further adjusted for ethnicity, length of time at residence, Townsend deprivation index, education level, employment status, 24-h weighted average noise, and  
 © 2023 American Medical Association. All rights reserved.



proximity to major roads (main model).  
HR, hazard ratio; CI, confidence interval.

**eTable 6.** Interaction Between PM<sub>2.5</sub>, NO<sub>2</sub>, and NO for Depression and Anxiety in Additive Hazards Models

|                                                 | No. additional deaths per 100,000 person-years (95% CI) |                        |
|-------------------------------------------------|---------------------------------------------------------|------------------------|
|                                                 | Depression                                              | Anxiety                |
| High PM <sub>2.5</sub> vs Low PM <sub>2.5</sub> | 0.308 (-0.750, 1.370)                                   | 0.418 (-0.752, 1.590)  |
| High NO <sub>2</sub> vs Low NO <sub>2</sub>     | -0.018 (-0.767, 0.731)                                  | -0.379 (-0.996, 0.238) |
| High PM <sub>2.5</sub> * High NO <sub>2</sub>   | -0.192 (-1.490, 1.100)                                  | 0.016 (-1.310, 1.340)  |
| High PM <sub>2.5</sub> vs Low PM <sub>2.5</sub> | 0.159 (-0.131, 0.449)                                   | 0.136 (-0.170, 0.442)  |
| High NO vs Low NO                               | -0.073 (-0.277, 0.131)                                  | -0.030 (-0.277, 0.217) |
| High PM <sub>2.5</sub> * High NO                | 0 (-0.355, 0.355)                                       | -0.037 (-0.427, 0.353) |
| High NO <sub>2</sub> vs Low NO <sub>2</sub>     | 0.217 (0.009, 0.425)                                    | 0.243 (0.016, 0.470)   |
| High NO vs Low NO                               | -0.083 (-0.262, 0.096)                                  | 0.020 (-0.194, 0.233)  |
| High NO <sub>2</sub> * High NO                  | -0.019 (-0.289, 0.252)                                  | -0.210 (-0.518, 0.098) |

Models were adjusted for age, sex, assessment centre, ethnicity, length of time at residence, Townsend deprivation index, education level, employment status, 24-h weighted average noise, and proximity to major roads.

High air pollution level indicates  $\geq 75^{\text{th}}$ , and low air pollution level indicates  $< 25^{\text{th}}$ .

**eTable 7.** Subgroup Analysis and Effect Modification for the Association of Incidence of Depression and Anxiety With Air Pollution Score

| Subgroup                    |                              | N       | Q1          |                       | Q2                |                       | Q3                |                       | Q4                |                       |
|-----------------------------|------------------------------|---------|-------------|-----------------------|-------------------|-----------------------|-------------------|-----------------------|-------------------|-----------------------|
|                             |                              |         | HR (95% CI) | <i>P</i> -interaction | HR (95% CI)       | <i>P</i> -interaction | HR (95% CI)       | <i>P</i> -interaction | HR (95% CI)       | <i>P</i> -interaction |
| <b>Depression</b>           |                              |         |             |                       |                   |                       |                   |                       |                   |                       |
| Age                         | <65 years                    | 312 639 | ref         | ref                   | 1.07 (1.01, 1.14) | ref                   | 1.16 (1.09, 1.23) | ref                   | 1.13 (1.05, 1.20) | ref                   |
|                             | ≥65 years                    | 76 546  | ref         | ref                   | 1.11 (0.99, 1.25) | 0.718                 | 1.25 (1.11, 1.41) | 0.544                 | 1.31 (1.14, 1.50) | 0.397                 |
| Sex                         | Female                       | 205 855 | ref         | ref                   | 1.05 (0.98, 1.12) | ref                   | 1.13 (1.06, 1.21) | ref                   | 1.13 (1.05, 1.22) | ref                   |
|                             | Male                         | 183 330 | ref         | ref                   | 1.12 (1.03, 1.22) | 0.223                 | 1.24 (1.13, 1.35) | 0.065                 | 1.20 (1.09, 1.32) | 0.061                 |
| Length of time at residence | <10 years                    | 122 209 | ref         | ref                   | 1.12 (1.03, 1.23) | ref                   | 1.20 (1.10, 1.31) | ref                   | 1.18 (1.07, 1.30) | ref                   |
|                             | ≥10 years                    | 266 976 | ref         | ref                   | 1.05 (0.99, 1.13) | 0.280                 | 1.16 (1.08, 1.24) | 0.567                 | 1.15 (1.06, 1.24) | 0.556                 |
| Education                   | Other                        | 262 624 | ref         | ref                   | 1.05 (0.99, 1.12) | ref                   | 1.15 (1.08, 1.22) | ref                   | 1.13 (1.05, 1.21) | ref                   |
|                             | University or college degree | 126 561 | ref         | ref                   | 1.17 (1.06, 1.30) | 0.113                 | 1.25 (1.12, 1.39) | 0.509                 | 1.27 (1.13, 1.43) | 0.917                 |
| <b>Anxiety</b>              |                              |         |             |                       |                   |                       |                   |                       |                   |                       |
| Age                         | <65 years                    | 312 639 | ref         | ref                   | 1.08 (1.02, 1.13) | ref                   | 1.12 (1.06, 1.18) | ref                   | 1.08 (1.02, 1.15) | ref                   |

|                             |                              |         |     |     |                   |       |                   |       |                   |       |
|-----------------------------|------------------------------|---------|-----|-----|-------------------|-------|-------------------|-------|-------------------|-------|
|                             | ≥65 years                    | 76 546  | ref | ref | 1.14 (1.03, 1.26) | 0.413 | 1.19 (1.07, 1.32) | 0.648 | 1.24 (1.10, 1.40) | 0.311 |
| Sex                         | Female                       | 205 855 | ref | ref | 1.05 (1.00, 1.12) | ref   | 1.11 (1.05, 1.18) | ref   | 1.08 (1.01, 1.16) | ref   |
|                             | Male                         | 183 330 | ref | ref | 1.16 (1.07, 1.26) | 0.065 | 1.18 (1.09, 1.28) | 0.284 | 1.16 (1.06, 1.27) | 0.021 |
| Length of time at residence | <10 years                    | 122 209 | ref | ref | 1.16 (1.07, 1.25) | ref   | 1.16 (1.07, 1.26) | ref   | 1.09 (1.00, 1.20) | ref   |
|                             | ≥10 years                    | 266 976 | ref | ref | 1.06 (1.00, 1.12) | 0.051 | 1.12 (1.06, 1.19) | 0.386 | 1.12 (1.05, 1.20) | 0.854 |
| Education                   | Other                        | 262 624 | ref | ref | 1.09 (1.03, 1.15) | ref   | 1.14 (1.08, 1.20) | ref   | 1.11 (1.04, 1.18) | ref   |
|                             | University or college degree | 126 561 | ref | ref | 1.10 (1.01, 1.20) | 0.875 | 1.12 (1.02, 1.23) | 0.486 | 1.13 (1.02, 1.25) | 0.561 |

HR, hazard ratio; CI, confidence interval. The models were adjusted for age, sex, assessment centre, ethnicity, length of time at residence, Townsend deprivation index, education level, employment status, 24-h weighted average noise, and proximity to major roads (main model).

**eTable 8.** Subgroup Analysis and Effect Modification for the Association of Incidence of Depression and Anxiety With PM<sub>2.5</sub>

| Subgroup                    | N                            | Q1          |                       | Q2          |                       | Q3          |                       | Q4          |                       |       |
|-----------------------------|------------------------------|-------------|-----------------------|-------------|-----------------------|-------------|-----------------------|-------------|-----------------------|-------|
|                             |                              | HR (95% CI) | <i>P</i> -interaction |       |
| <b>Depression</b>           |                              |             |                       |             |                       |             |                       |             |                       |       |
| Age                         | <65 years                    | 312 639     | ref                   | ref         | 1.09 (1.02, 1.15)     | ref         | 1.13 (1.07, 1.20)     | ref         | 1.13 (1.06, 1.20)     | ref   |
|                             | ≥65 years                    | 76 546      | ref                   | ref         | 1.09 (0.97, 1.22)     | 0.845       | 1.18 (1.05, 1.32)     | 0.850       | 1.22 (1.07, 1.39)     | 0.907 |
| Sex                         | Female                       | 205 855     | ref                   | ref         | 1.07 (1.00, 1.14)     | ref         | 1.09 (1.02, 1.17)     | ref         | 1.10 (1.03, 1.19)     | ref   |
|                             | Male                         | 183 330     | ref                   | ref         | 1.11 (1.02, 1.21)     | 0.444       | 1.21 (1.11, 1.32)     | 0.061       | 1.21 (1.10, 1.33)     | 0.028 |
| Length of time at residence | <10 years                    | 122 209     | ref                   | ref         | 1.11 (1.02, 1.21)     | ref         | 1.17 (1.07, 1.28)     | ref         | 1.16 (1.06, 1.28)     | ref   |
|                             | ≥10 years                    | 266 976     | ref                   | ref         | 1.07 (1.00, 1.14)     | 0.543       | 1.12 (1.05, 1.20)     | 0.496       | 1.14 (1.06, 1.22)     | 0.695 |
| Education                   | Other                        | 262 624     | ref                   | ref         | 1.07 (1.00, 1.13)     | ref         | 1.13 (1.06, 1.20)     | ref         | 1.13 (1.06, 1.21)     | ref   |
|                             | University or college degree | 126 561     | ref                   | ref         | 1.15 (1.03, 1.27)     | 0.303       | 1.18 (1.06, 1.31)     | 0.897       | 1.21 (1.08, 1.35)     | 0.665 |
| <b>Anxiety</b>              |                              |             |                       |             |                       |             |                       |             |                       |       |
| Age                         | <65 years                    | 312 639     | ref                   | ref         | 1.06 (1.01, 1.12)     | ref         | 1.11 (1.05, 1.17)     | ref         | 1.08 (1.02, 1.14)     | ref   |

|                             |                              |         |     |     |                   |       |                   |       |                   |       |
|-----------------------------|------------------------------|---------|-----|-----|-------------------|-------|-------------------|-------|-------------------|-------|
|                             | ≥65 years                    | 76 546  | ref | ref | 1.17 (1.06, 1.29) | 0.149 | 1.13 (1.02, 1.26) | 0.933 | 1.22 (1.09, 1.37) | 0.317 |
| Sex                         | Female                       | 205 855 | ref | ref | 1.06 (1.01, 1.13) | ref   | 1.11 (1.05, 1.17) | ref   | 1.07 (1.00, 1.14) | ref   |
|                             | Male                         | 183 330 | ref | ref | 1.13 (1.04, 1.22) | 0.285 | 1.12 (1.04, 1.22) | 0.779 | 1.18 (1.08, 1.29) | 0.009 |
| Length of time at residence | <10 years                    | 122 209 | ref | ref | 1.13 (1.04, 1.23) | ref   | 1.13 (1.05, 1.23) | ref   | 1.11 (1.02, 1.21) | ref   |
|                             | ≥10 years                    | 266 976 | ref | ref | 1.06 (1.00, 1.13) | 0.189 | 1.10 (1.04, 1.17) | 0.517 | 1.11 (1.04, 1.18) | 0.597 |
| Education                   | Other                        | 262 624 | ref | ref | 1.07 (1.01, 1.13) | ref   | 1.11 (1.05, 1.17) | ref   | 1.10 (1.03, 1.16) | ref   |
|                             | University or college degree | 126 561 | ref | ref | 1.14 (1.04, 1.24) | 0.295 | 1.11 (1.02, 1.22) | 0.701 | 1.15 (1.04, 1.27) | 0.961 |

PM<sub>2.5</sub>, particulate matter with aerodynamic diameter ≤2.5 μm; HR, hazard ratio; CI, confidence interval. Models were adjusted for age, sex, assessment centre, ethnicity, length of time at residence, Townsend deprivation index, education level, employment status, 24-h weighted average noise, and proximity to major roads (main model).

**eTable 9.** Subgroup Analysis and Effect Modification for the Association of Incidence of Depression and Anxiety With NO<sub>2</sub>

| Subgroup                    |                              | N       | Q1          |               | Q2                |               | Q3                |               | Q4                |               |
|-----------------------------|------------------------------|---------|-------------|---------------|-------------------|---------------|-------------------|---------------|-------------------|---------------|
|                             |                              |         | HR (95% CI) | P-interaction | HR (95% CI)       | P-interaction | HR (95% CI)       | P-interaction | HR (95% CI)       | P-interaction |
| <b>Depression</b>           |                              |         |             |               |                   |               |                   |               |                   |               |
| Age                         | <65 years                    | 312 639 | ref         | ref           | 1.10 (1.04, 1.17) | ref           | 1.13 (1.06, 1.20) | ref           | 1.10 (1.03, 1.18) | ref           |
|                             | ≥65 years                    | 76 546  | ref         | ref           | 1.16 (1.03, 1.30) | 0.575         | 1.26 (1.11, 1.42) | 0.347         | 1.29 (1.12, 1.49) | 0.365         |
| Sex                         | Female                       | 205 855 | ref         | ref           | 1.08 (1.01, 1.15) | ref           | 1.15 (1.07, 1.23) | ref           | 1.10 (1.02, 1.19) | ref           |
|                             | Male                         | 183 330 | ref         | ref           | 1.16 (1.07, 1.26) | 0.138         | 1.16 (1.06, 1.26) | 0.618         | 1.19 (1.08, 1.31) | 0.037         |
| Length of time at residence | <10 years                    | 122 209 | ref         | ref           | 1.14 (1.05, 1.24) | ref           | 1.18 (1.08, 1.29) | ref           | 1.16 (1.05, 1.29) | ref           |
|                             | ≥10 years                    | 266 976 | ref         | ref           | 1.10 (1.03, 1.17) | 0.533         | 1.14 (1.07, 1.22) | 0.682         | 1.12 (1.04, 1.21) | 0.655         |
| Education                   | Other                        | 262 624 | ref         | ref           | 1.11 (1.04, 1.18) | ref           | 1.13 (1.06, 1.20) | ref           | 1.11 (1.04, 1.20) | ref           |
|                             | University or college degree | 126 561 | ref         | ref           | 1.12 (1.01, 1.24) | 0.964         | 1.23 (1.10, 1.37) | 0.483         | 1.23 (1.09, 1.38) | 0.754         |
| <b>Anxiety</b>              |                              |         |             |               |                   |               |                   |               |                   |               |
| Age                         | <65 years                    | 312 639 | ref         | ref           | 1.06 (1.00, 1.11) | ref           | 1.09 (1.04, 1.15) | ref           | 1.06 (1.00, 1.13) | ref           |

|                             |                              |         |     |     |                   |       |                   |       |                   |       |
|-----------------------------|------------------------------|---------|-----|-----|-------------------|-------|-------------------|-------|-------------------|-------|
|                             | ≥65 years                    | 76 546  | ref | ref | 1.07 (0.96, 1.18) | 0.959 | 1.13 (1.02, 1.26) | 0.919 | 1.19 (1.05, 1.34) | 0.582 |
| Sex                         | Female                       | 205 855 | ref | ref | 1.04 (0.99, 1.11) | ref   | 1.08 (1.02, 1.15) | ref   | 1.07 (1.00, 1.15) | ref   |
|                             | Male                         | 183 330 | ref | ref | 1.08 (1.00, 1.17) | 0.628 | 1.14 (1.05, 1.23) | 0.390 | 1.10 (1.00, 1.21) | 0.163 |
| Length of time at residence | <10 years                    | 122 209 | ref | ref | 1.09 (1.01, 1.18) | ref   | 1.11 (1.02, 1.21) | ref   | 1.04 (0.94, 1.14) | ref   |
|                             | ≥10 years                    | 266 976 | ref | ref | 1.04 (0.98, 1.10) | 0.130 | 1.10 (1.04, 1.17) | 0.534 | 1.11 (1.03, 1.19) | 0.397 |
| Education                   | Other                        | 262 624 | ref | ref | 1.05 (0.99, 1.11) | ref   | 1.09 (1.03, 1.15) | ref   | 1.08 (1.01, 1.15) | ref   |
|                             | University or college degree | 126 561 | ref | ref | 1.08 (0.99, 1.18) | 0.660 | 1.13 (1.03, 1.24) | 0.845 | 1.10 (0.99, 1.23) | 0.538 |

NO<sub>2</sub>, nitrogen dioxide; HR, hazard ratio; CI, confidence interval. Models were adjusted for age, sex, assessment centre, ethnicity, length of time at residence, Townsend deprivation index, education level, employment status, 24-h weighted average noise, and proximity to major roads (main model).



**eTable 10.** Subgroup Analysis and Effect Modification for the Association of Incidence of Depression and Anxiety With NO

| Subgroup                    |                              | N       | Q1          |               | Q2                |               | Q3                |               | Q4                |               |
|-----------------------------|------------------------------|---------|-------------|---------------|-------------------|---------------|-------------------|---------------|-------------------|---------------|
|                             |                              |         | HR (95% CI) | P-interaction | HR (95% CI)       | P-interaction | HR (95% CI)       | P-interaction | HR (95% CI)       | P-interaction |
| <b>Depression</b>           |                              |         |             |               |                   |               |                   |               |                   |               |
| Age                         | <65 years                    | 312 639 | ref         | ref           | 1.06 (1.00, 1.12) | ref           | 1.11 (1.05, 1.17) | ref           | 1.10 (1.03, 1.17) | ref           |
|                             | ≥65 years                    | 76 546  | ref         | ref           | 1.14 (1.02, 1.28) | 0.308         | 1.12 (1.00, 1.26) | 0.907         | 1.19 (1.04, 1.35) | 0.771         |
| Sex                         | Female                       | 205 855 | ref         | ref           | 1.07 (1.01, 1.15) | ref           | 1.09 (1.02, 1.17) | ref           | 1.12 (1.04, 1.20) | ref           |
|                             | Male                         | 183 330 | ref         | ref           | 1.07 (0.98, 1.16) | 1.000         | 1.14 (1.05, 1.24) | 0.283         | 1.11 (1.01, 1.21) | 0.472         |
| Length of time at residence | <10 years                    | 122 209 | ref         | ref           | 1.12 (1.03, 1.22) | ref           | 1.13 (1.04, 1.23) | ref           | 1.13 (1.03, 1.23) | ref           |
|                             | ≥10 years                    | 266 976 | ref         | ref           | 1.05 (0.98, 1.12) | 0.207         | 1.10 (1.03, 1.17) | 0.660         | 1.12 (1.04, 1.20) | 0.673         |
| Education                   | Other                        | 262 624 | ref         | ref           | 1.06 (1.00, 1.12) | ref           | 1.11 (1.04, 1.17) | ref           | 1.08 (1.01, 1.15) | ref           |
|                             | University or college degree | 126 561 | ref         | ref           | 1.12 (1.01, 1.24) | 0.459         | 1.14 (1.02, 1.26) | 0.834         | 1.26 (1.13, 1.41) | 0.485         |
| <b>Anxiety</b>              |                              |         |             |               |                   |               |                   |               |                   |               |
| Age                         | <65 years                    | 312 639 | ref         | ref           | 1.08 (1.02, 1.14) | ref           | 1.13 (1.07, 1.19) | ref           | 1.07 (1.01, 1.13) | ref           |

|                             |                              |         |     |     |                   |       |                   |       |                   |       |
|-----------------------------|------------------------------|---------|-----|-----|-------------------|-------|-------------------|-------|-------------------|-------|
|                             | ≥65 years                    | 76 546  | ref | ref | 1.12 (1.01, 1.23) | 0.633 | 1.13 (1.02, 1.25) | 0.750 | 1.13 (1.01, 1.27) | 0.877 |
| Sex                         | Female                       | 205 855 | ref | ref | 1.05 (1.00, 1.12) | ref   | 1.11 (1.05, 1.17) | ref   | 1.05 (0.99, 1.12) | ref   |
|                             | Male                         | 183 330 | ref | ref | 1.15 (1.06, 1.24) | 0.099 | 1.18 (1.09, 1.28) | 0.170 | 1.13 (1.04, 1.24) | 0.023 |
| Length of time at residence | <10 years                    | 122 209 | ref | ref | 1.14 (1.06, 1.24) | ref   | 1.20 (1.11, 1.30) | ref   | 1.09 (0.99, 1.18) | ref   |
|                             | ≥10 years                    | 266 976 | ref | ref | 1.06 (1.00, 1.12) | 0.134 | 1.10 (1.04, 1.16) | 0.061 | 1.08 (1.02, 1.15) | 0.419 |
| Education                   | Other                        | 262 624 | ref | ref | 1.07 (1.02, 1.13) | ref   | 1.13 (1.07, 1.19) | ref   | 1.08 (1.02, 1.15) | ref   |
|                             | University or college degree | 126 561 | ref | ref | 1.13 (1.03, 1.23) | 0.399 | 1.15 (1.05, 1.26) | 0.961 | 1.09 (0.99, 1.21) | 0.675 |

NO, nitric oxide; HR, hazard ratio; CI, confidence interval. Models were adjusted for age, sex, assessment centre, ethnicity, length of time at residence, Townsend deprivation index, education level, employment status, 24-h weighted average noise, and proximity to major roads (main model).

**eTable 11.** Associations of Incidence of Depression and Anxiety With Exposure to Air Pollutants by Multiple Imputation

|                   | PM <sub>2.5</sub> |         | PM <sub>2.5-10</sub> |         | NO <sub>2</sub>   |         | NO                |         | Air pollution score |         |
|-------------------|-------------------|---------|----------------------|---------|-------------------|---------|-------------------|---------|---------------------|---------|
|                   | HR (95% CI)       | P value | HR (95% CI)          | P value | HR (95% CI)       | P value | HR (95% CI)       | P value | HR (95% CI)         | P value |
| <b>Depression</b> |                   |         |                      |         |                   |         |                   |         |                     |         |
| Quartile 1        | ref               |         | ref                  |         | ref               |         | ref               |         | ref                 |         |
| Quartile 2        | 1.09 (1.04, 1.15) | <0.001  | 1.00 (0.95, 1.05)    | 0.923   | 1.11 (1.05, 1.16) | <0.001  | 1.06 (1.01, 1.11) | 0.019   | 1.09 (1.03, 1.14)   | 0.001   |
| Quartile 3        | 1.13 (1.08, 1.19) | <0.001  | 1.01 (0.96, 1.06)    | 0.772   | 1.15 (1.09, 1.21) | <0.001  | 1.11 (1.06, 1.16) | <0.001  | 1.17 (1.11, 1.23)   | <0.001  |
| Quartile 4        | 1.14 (1.08, 1.20) | <0.001  | 1.01 (0.96, 1.06)    | 0.796   | 1.11 (1.05, 1.18) | <0.001  | 1.12 (1.06, 1.18) | 0<0.001 | 1.14 (1.08, 1.21)   | <0.001  |
| <b>Anxiety</b>    |                   |         |                      |         |                   |         |                   |         |                     |         |
| Quartile 1        | ref               |         | ref                  |         | ref               |         | ref               |         | ref                 |         |
| Quartile 2        | 1.08 (1.04, 1.13) | <0.001  | 1.02 (0.97, 1.06)    | 0.427   | 1.05 (1.01, 1.10) | 0.022   | 1.08 (1.03, 1.13) | 0.001   | 1.07 (1.02, 1.12)   | 0.002   |
| Quartile 3        | 1.10 (1.06, 1.15) | <0.001  | 1.01 (0.96, 1.06)    | 0.694   | 1.10 (1.05, 1.15) | <0.001  | 1.11 (1.06, 1.16) | <0.001  | 1.13 (1.08, 1.18)   | <0.001  |
| Quartile 4        | 1.10 (1.05, 1.15) | <0.001  | 1.04 (0.99, 1.09)    | 0.154   | 1.07 (1.02, 1.13) | 0.011   | 1.08 (1.03, 1.13) | 0.003   | 1.11 (1.05, 1.17)   | <0.001  |

PM<sub>2.5</sub>, particulate matter with aerodynamic diameter ≤2.5 μm; PM<sub>2.5-10</sub>, particulate matter with aerodynamic diameter between 2.5 and 10 μm; NO<sub>2</sub>, nitrogen dioxide; NO, nitric oxide; HR, hazard ratio; CI, confidence interval.

Models were adjusted for age, sex, assessment centre, ethnicity, length of time at residence, Townsend deprivation index, education level, employment status, 24-h weighted average noise, and proximity to major roads (main model). N = 440 828.

**eTable 12.** Associations of Incidence of Depression and Anxiety With Exposure to Air Pollutants by Further Adjusting for Household Income

|                            | PM <sub>2.5</sub> |  |         | PM <sub>2.5-10</sub> |  |         | NO <sub>2</sub>   |  |         | NO                |         | Air pollution score |                   |         |        |
|----------------------------|-------------------|--|---------|----------------------|--|---------|-------------------|--|---------|-------------------|---------|---------------------|-------------------|---------|--------|
|                            | HR (95% CI)       |  | P value | HR (95% CI)          |  | P value | HR (95% CI)       |  | P value | HR (95% CI)       | P value | HR (95% CI)         |                   | P value |        |
| <b>Incident depression</b> |                   |  |         |                      |  |         |                   |  |         |                   |         |                     |                   |         |        |
| Quartile 1                 | ref               |  |         | ref                  |  |         | ref               |  |         | ref               |         | ref                 |                   |         |        |
| Quartile 2                 | 1.06 (1.01, 1.12) |  | 0.027   | 1.01 (0.96, 1.06)    |  | 0.841   | 1.08 (1.03, 1.14) |  | 0.004   | 1.05 (1.00, 1.11) |         | 0.066               | 1.05 (1.00, 1.11) |         | 0.057  |
| Quartile 3                 | 1.10 (1.05, 1.16) |  | <0.001  | 1.01 (0.96, 1.06)    |  | 0.826   | 1.12 (1.06, 1.18) |  | <0.001  | 1.08 (1.02, 1.13) |         | 0.005               | 1.13 (1.07, 1.19) |         | <0.001 |
| Quartile 4                 | 1.11 (1.05, 1.17) |  | <0.001  | 0.99 (0.94, 1.05)    |  | 0.848   | 1.10 (1.04, 1.17) |  | 0.002   | 1.08 (1.02, 1.14) |         | 0.009               | 1.12 (1.06, 1.19) |         | <0.001 |
| <b>Incident anxiety</b>    |                   |  |         |                      |  |         |                   |  |         |                   |         |                     |                   |         |        |
| Quartile 1                 | ref               |  |         | ref                  |  |         | ref               |  |         | ref               |         | ref                 |                   |         |        |
| Quartile 2                 | 1.07 (1.02, 1.12) |  | 0.003   | 1.02 (0.97, 1.06)    |  | 0.457   | 1.04 (0.99, 1.09) |  | 0.098   | 1.07 (1.02, 1.12) |         | 0.003               | 1.07 (1.03, 1.13) |         | 0.002  |
| Quartile 3                 | 1.10 (1.05, 1.15) |  | <0.001  | 1.00 (0.96, 1.05)    |  | 0.874   | 1.08 (1.03, 1.14) |  | 0.001   | 1.11 (1.06, 1.16) |         | <0.001              | 1.11 (1.06, 1.17) |         | <0.001 |
| Quartile 4                 | 1.09 (1.03, 1.15) |  | 0.001   | 1.03 (0.98, 1.08)    |  | 0.290   | 1.07 (1.01, 1.13) |  | 0.026   | 1.06 (1.01, 1.12) |         | 0.024               | 1.09 (1.03, 1.15) |         | 0.002  |

PM<sub>2.5</sub>, particulate matter with aerodynamic diameter  $\leq 2.5$   $\mu\text{m}$ ; PM<sub>2.5-10</sub>, particulate matter with aerodynamic diameter between 2.5 and 10  $\mu\text{m}$ ; NO<sub>2</sub>, nitrogen dioxide; NO, nitric oxide; HR, hazard ratio; CI, confidence interval.

Models were adjusted for age, sex, assessment centre, ethnicity, length of time at residence, Townsend deprivation index, education level, employment status, 24-h weighted average noise, and proximity to major roads (main model).

**eTable 13.** Associations of Incidence of Depression and Anxiety With Exposure to Air Pollutants by Further Adjusting for Green Space Percentage

|                            | PM <sub>2.5</sub> |                | PM <sub>2.5-10</sub> |                | NO <sub>2</sub>   |                | NO                |                | Air pollution score |                |
|----------------------------|-------------------|----------------|----------------------|----------------|-------------------|----------------|-------------------|----------------|---------------------|----------------|
|                            | HR (95% CI)       | <i>P</i> value | HR (95% CI)          | <i>P</i> value | HR (95% CI)       | <i>P</i> value | HR (95% CI)       | <i>P</i> value | HR (95% CI)         | <i>P</i> value |
| <b>Incident depression</b> |                   |                |                      |                |                   |                |                   |                |                     |                |
| Quartile 1                 | ref               |                | ref                  |                | ref               |                | ref               |                | ref                 |                |
| Quartile 2                 | 1.09 (1.03, 1.15) | 0.003          | 1.01 (0.96, 1.06)    | 0.765          | 1.12 (1.05, 1.18) | <0.001         | 1.06 (1.01, 1.12) | 0.021          | 1.09 (1.03, 1.15)   | 0.004          |
| Quartile 3                 | 1.15 (1.08, 1.22) | <0.001         | 1.01 (0.96, 1.06)    | 0.669          | 1.16 (1.09, 1.25) | <0.001         | 1.10 (1.04, 1.16) | <0.001         | 1.19 (1.12, 1.26)   | <0.001         |
| Quartile 4                 | 1.15 (1.07, 1.24) | <0.001         | 1.01 (0.95, 1.06)    | 0.771          | 1.15 (1.06, 1.25) | <0.001         | 1.10 (1.04, 1.17) | 0.002          | 1.18 (1.09, 1.27)   | <0.001         |
| <b>Incident anxiety</b>    |                   |                |                      |                |                   |                |                   |                |                     |                |
| Quartile 1                 | ref               |                | ref                  |                | ref               |                | ref               |                | ref                 |                |
| Quartile 2                 | 1.09 (1.04, 1.15) | <0.001         | 1.01 (0.97, 1.06)    | 0.525          | 1.06 (1.01, 1.12) | 0.024          | 1.08 (1.03, 1.13) | 0.001          | 1.10 (1.05, 1.16)   | <0.001         |
| Quartile 3                 | 1.13 (1.07, 1.19) | <0.001         | 1.00 (0.96, 1.05)    | 0.838          | 1.11 (1.04, 1.18) | 0.001          | 1.12 (1.07, 1.18) | <0.001         | 1.15 (1.09, 1.22)   | <0.001         |
| Quartile 4                 | 1.12 (1.05, 1.20) | <0.001         | 1.03 (0.98, 1.08)    | 0.215          | 1.09 (1.02, 1.18) | 0.019          | 1.07 (1.02, 1.14) | 0.010          | 1.13 (1.06, 1.21)   | <0.001         |

PM<sub>2.5</sub>, particulate matter with aerodynamic diameter  $\leq 2.5$   $\mu\text{m}$ ; PM<sub>2.5-10</sub>, particulate matter with aerodynamic diameter between 2.5 and 10  $\mu\text{m}$ ; NO<sub>2</sub>, nitrogen dioxide; NO, nitric oxide; HR, hazard ratio; CI, confidence interval.

Models were adjusted for age, sex, assessment centre, ethnicity, length of time at residence, Townsend deprivation index, education level, employment status, 24-h weighted average noise, and proximity to major roads (main model).

**eTable 14.** Associations of Incidence of Depression and Anxiety With Exposure to Air Pollutants by Replacing Townsend Deprivation Index With Income Score and Housing Score

|                   | PM <sub>2.5</sub> |                | PM <sub>2.5-10</sub> |                | NO <sub>2</sub>   |                | NO                |                | Air pollution score |                |
|-------------------|-------------------|----------------|----------------------|----------------|-------------------|----------------|-------------------|----------------|---------------------|----------------|
|                   | HR (95% CI)       | <i>P</i> value | HR (95% CI)          | <i>P</i> value | HR (95% CI)       | <i>P</i> value | HR (95% CI)       | <i>P</i> value | HR (95% CI)         | <i>P</i> value |
| <b>Depression</b> |                   |                |                      |                |                   |                |                   |                |                     |                |
| Quartile 1        | ref               |                | ref                  |                | ref               |                | ref               |                | ref                 |                |
| Quartile 2        | 1.10 (1.04, 1.16) | <0.001         | 1.01 (0.96, 1.07)    | 0.605          | 1.12 (1.06, 1.18) | <0.001         | 1.08 (1.03, 1.14) | 0.003          | 1.10 (1.04, 1.16)   | <0.001         |
| Quartile 3        | 1.18 (1.12, 1.24) | <0.001         | 1.02 (0.97, 1.08)    | 0.378          | 1.18 (1.12, 1.25) | <0.001         | 1.14 (1.08, 1.20) | <0.001         | 1.21 (1.14, 1.27)   | <0.001         |
| Quartile 4        | 1.22 (1.15, 1.29) | <0.001         | 1.03 (0.97, 1.08)    | 0.358          | 1.21 (1.14, 1.29) | <0.001         | 1.18 (1.11, 1.25) | <0.001         | 1.24 (1.17, 1.32)   | <0.001         |
| <b>Anxiety</b>    |                   |                |                      |                |                   |                |                   |                |                     |                |
| Quartile 1        | ref               |                | ref                  |                | ref               |                | ref               |                | ref                 |                |
| Quartile 2        | 1.08 (1.03, 1.13) | 0.001          | 1.02 (0.97, 1.06)    | 0.500          | 1.05 (1.00, 1.10) | 0.044          | 1.08 (1.04, 1.14) | <0.001         | 1.09 (1.04, 1.14)   | <0.001         |
| Quartile 3        | 1.12 (1.06, 1.17) | <0.001         | 1.01 (0.96, 1.06)    | 0.681          | 1.10 (1.05, 1.16) | <0.001         | 1.14 (1.09, 1.19) | <0.001         | 1.14 (1.09, 1.20)   | <0.001         |
| Quartile 4        | 1.12 (1.07, 1.18) | <0.001         | 1.03 (0.98, 1.09)    | 0.185          | 1.10 (1.04, 1.16) | <0.001         | 1.10 (1.05, 1.16) | <0.001         | 1.13 (1.07, 1.19)   | <0.001         |

PM<sub>2.5</sub>, particulate matter with aerodynamic diameter ≤2.5 μm; PM<sub>2.5-10</sub>, particulate matter with aerodynamic diameter between 2.5 and 10 μm; NO<sub>2</sub>, nitrogen dioxide; NO, nitric oxide; HR, hazard ratio; CI, confidence interval.

Models were adjusted for age, sex, assessment centre, ethnicity, length of time at residence, Townsend deprivation index, education level, employment status, 24-h weighted average noise, and proximity to major roads.

**eTable 15.** Associations of Incidence of Depression and Anxiety With Exposure to Air Pollutants by Avoiding the Second Depression Outcome for the Same Person if Follow-up Anxiety Was Diagnosed First, and Vice Versa

|                            | PM <sub>2.5</sub> |                | PM <sub>2.5-10</sub> |                | NO <sub>2</sub>   |                | NO                |                | Air pollution score |                |
|----------------------------|-------------------|----------------|----------------------|----------------|-------------------|----------------|-------------------|----------------|---------------------|----------------|
|                            | HR (95% CI)       | <i>P</i> value | HR (95% CI)          | <i>P</i> value | HR (95% CI)       | <i>P</i> value | HR (95% CI)       | <i>P</i> value | HR (95% CI)         | <i>P</i> value |
| <b>Incident depression</b> |                   |                |                      |                |                   |                |                   |                |                     |                |
| Quartile 1                 | ref               |                | ref                  |                | ref               |                | ref               |                | ref                 |                |
| Quartile 2                 | 1.09 (1.03, 1.15) | 0.002          | 1.01 (0.96, 1.06)    | 0.711          | 1.11 (1.05, 1.17) | <0.001         | 1.06 (1.00, 1.12) | 0.038          | 1.08 (1.02, 1.14)   | 0.009          |
| Quartile 3                 | 1.14 (1.08, 1.20) | <0.001         | 1.02 (0.97, 1.08)    | 0.438          | 1.15 (1.09, 1.22) | <0.001         | 1.10 (1.05, 1.17) | <0.001         | 1.18 (1.11, 1.24)   | <0.001         |
| Quartile 4                 | 1.13 (1.07, 1.20) | <0.001         | 1.01 (0.95, 1.07)    | 0.792          | 1.13 (1.06, 1.20) | <0.001         | 1.11 (1.05, 1.18) | <0.001         | 1.15 (1.08, 1.22)   | <0.001         |
| <b>Incident anxiety</b>    |                   |                |                      |                |                   |                |                   |                |                     |                |
| Quartile 1                 | ref               |                | ref                  |                | ref               |                | ref               |                | ref                 |                |
| Quartile 2                 | 1.08 (1.03, 1.13) | 0.002          | 1.03 (0.98, 1.08)    | 0.258          | 1.04 (0.99, 1.09) | 0.104          | 1.09 (1.04, 1.14) | <0.001         | 1.08 (1.03, 1.14)   | 0.001          |
| Quartile 3                 | 1.11 (1.06, 1.16) | <0.001         | 1.01 (0.97, 1.06)    | 0.585          | 1.09 (1.03, 1.14) | 0.001          | 1.13 (1.08, 1.19) | <0.001         | 1.13 (1.07, 1.18)   | <0.001         |
| Quartile 4                 | 1.10 (1.05, 1.16) | <0.001         | 1.04 (0.99, 1.10)    | 0.114          | 1.07 (1.01, 1.14) | 0.014          | 1.08 (1.02, 1.14) | 0.005          | 1.10 (1.04, 1.17)   | <0.001         |

PM<sub>2.5</sub>, particulate matter with aerodynamic diameter ≤2.5 μm; PM<sub>2.5-10</sub>, particulate matter with aerodynamic diameter between 2.5 and 10 μm; NO<sub>2</sub>, nitrogen dioxide; NO, nitric oxide; HR, hazard ratio; CI, confidence interval.

Models were adjusted for age, sex, assessment centre, ethnicity, length of time at residence, Townsend deprivation index, education level, employment status, 24-h weighted average noise, and proximity to major roads.

**eTable 16.** Associations of Incidence of Depression and Anxiety With Exposure to Air Pollutants by Excluding Depression and Anxiety Cases Occurred in the First 2 Years of Follow-up

|                   | PM <sub>2.5</sub> |                | PM <sub>2.5-10</sub> |                | NO <sub>2</sub>   |                | NO                |                | Air pollution score |                |
|-------------------|-------------------|----------------|----------------------|----------------|-------------------|----------------|-------------------|----------------|---------------------|----------------|
|                   | HR (95% CI)       | <i>P</i> value | HR (95% CI)          | <i>P</i> value | HR (95% CI)       | <i>P</i> value | HR (95% CI)       | <i>P</i> value | HR (95% CI)         | <i>P</i> value |
| <b>Depression</b> |                   |                |                      |                |                   |                |                   |                |                     |                |
| Quartile 1        | ref               |                | ref                  |                | ref               |                | ref               |                | ref                 |                |
| Quartile 2        | 1.08 (1.02, 1.14) | 0.011          | 1.03 (0.98, 1.09)    | 0.254          | 1.11 (1.05, 1.17) | <0.001         | 1.08 (1.02, 1.14) | 0.007          | 1.07 (1.01, 1.13)   | 0.024          |
| Quartile 3        | 1.12 (1.06, 1.19) | <0.001         | 1.03 (0.98, 1.09)    | 0.283          | 1.14 (1.08, 1.21) | <0.001         | 1.11 (1.05, 1.18) | <0.001         | 1.16 (1.09, 1.23)   | <0.001         |
| Quartile 4        | 1.13 (1.07, 1.20) | <0.001         | 1.01 (0.95, 1.07)    | 0.710          | 1.13 (1.06, 1.21) | <0.001         | 1.12 (1.06, 1.19) | <0.001         | 1.15 (1.08, 1.23)   | <0.001         |
| <b>Anxiety</b>    |                   |                |                      |                |                   |                |                   |                |                     |                |
| Quartile 1        | ref               |                | ref                  |                | ref               |                | ref               |                | ref                 |                |
| Quartile 2        | 1.08 (1.02, 1.13) | 0.005          | 1.02 (0.97, 1.07)    | 0.444          | 1.06 (1.01, 1.12) | 0.017          | 1.08 (1.03, 1.13) | 0.003          | 1.08 (1.03, 1.14)   | 0.003          |
| Quartile 3        | 1.11 (1.05, 1.16) | <0.001         | 1.02 (0.97, 1.07)    | 0.539          | 1.12 (1.06, 1.18) | <0.001         | 1.13 (1.07, 1.18) | <0.001         | 1.14 (1.08, 1.20)   | <0.001         |
| Quartile 4        | 1.11 (1.05, 1.17) | <0.001         | 1.04 (0.99, 1.10)    | 0.155          | 1.10 (1.03, 1.17) | 0.003          | 1.08 (1.02, 1.14) | 0.010          | 1.12 (1.05, 1.18)   | <0.001         |

PM<sub>2.5</sub>, particulate matter with aerodynamic diameter  $\leq 2.5$   $\mu\text{m}$ ; PM<sub>2.5-10</sub>, particulate matter with aerodynamic diameter between 2.5 and 10  $\mu\text{m}$ ; NO<sub>2</sub>, nitrogen dioxide; NO, nitric oxide; HR, hazard ratio; CI, confidence interval.

Models were adjusted for age, sex, assessment centre, ethnicity, length of time at residence, Townsend deprivation index, education level, employment status, 24-h weighted average noise, and proximity to major roads.



**eTable 17.** Associations of Incidence of Depression and Anxiety With Time-Varying PM<sub>2.5</sub>

|            | <b>HR (95% CI)</b> | <b>P value</b> |
|------------|--------------------|----------------|
| Depression |                    |                |
| Quartile 1 | ref                | /              |
| Quartile 2 | 1.06 (1.00 ,1.12)  | 0.046          |
| Quartile 3 | 1.10 (1.04 ,1.16)  | 0.001          |
| Quartile 4 | 1.07 (1.01 ,1.15)  | 0.035          |
| Anxiety    |                    |                |
| Quartile 1 | ref                | /              |
| Quartile 2 | 1.09 (1.04 ,1.14)  | 0.001          |
| Quartile 3 | 1.06 (1.01 ,1.12)  | 0.023          |
| Quartile 4 | 1.07 (1.00 ,1.13)  | 0.037          |

The models were adjusted for age, sex, assessment center, ethnicity, length of time at residence, Townsend deprivation index, education level, employment status, 24-h weighted average noise, and proximity to major roads (main model).

Quartile 1: < 8.6 µg/m<sup>3</sup>; Quartile 2: 8.6 ~ 10.5 µg/m<sup>3</sup>; Quartile 3: 10.5 ~ 12.2 µg/m<sup>3</sup>; Quartile 4: ≥12.2 µg/m<sup>3</sup>.

Time-varying PM<sub>2.5</sub> concentrations are updated to 2018. The median PM<sub>2.5</sub> concentrations are 10.5 µg/m<sup>3</sup>.

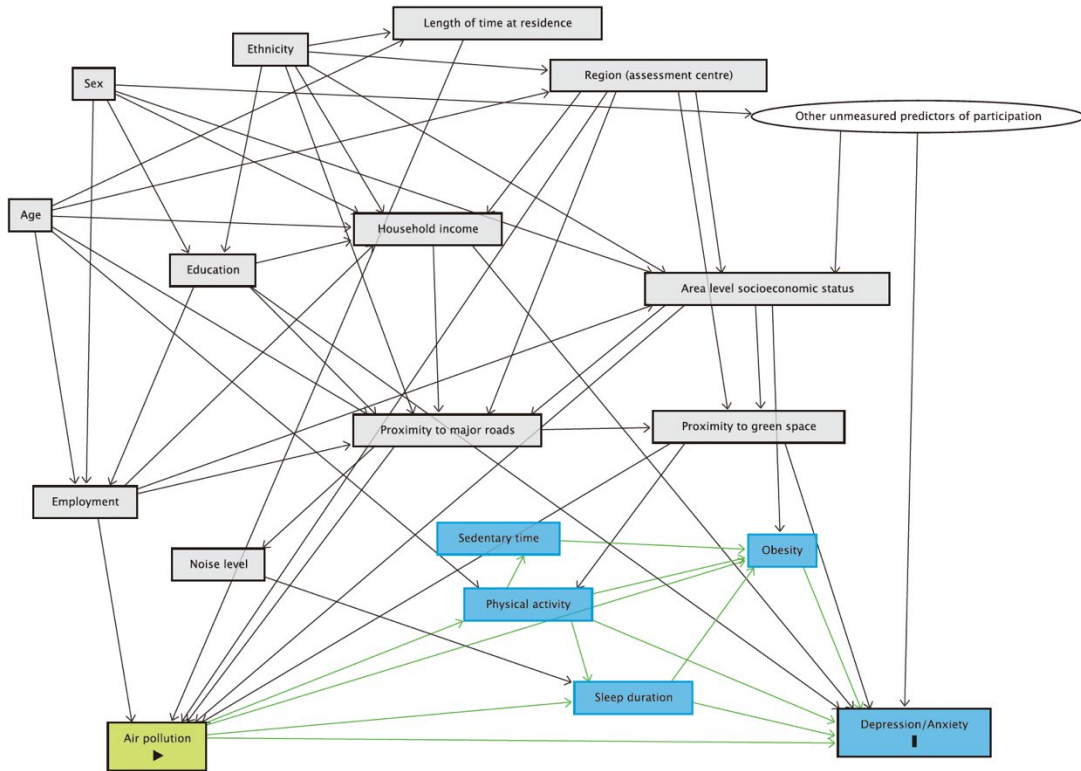

**Figure 1.** Directed Acyclic Graph for the Association Between Air Pollution and Depression or Anxiety

*Air pollution* indicates exposure, and *Depression/Anxiety* indicates outcomes. For other covariates, grey color indicates these covariates are adjusted in the analysis, blue color indicates these covariates lie the casual path between exposure and outcomes, and white color indicates these covariates are unmeasured.

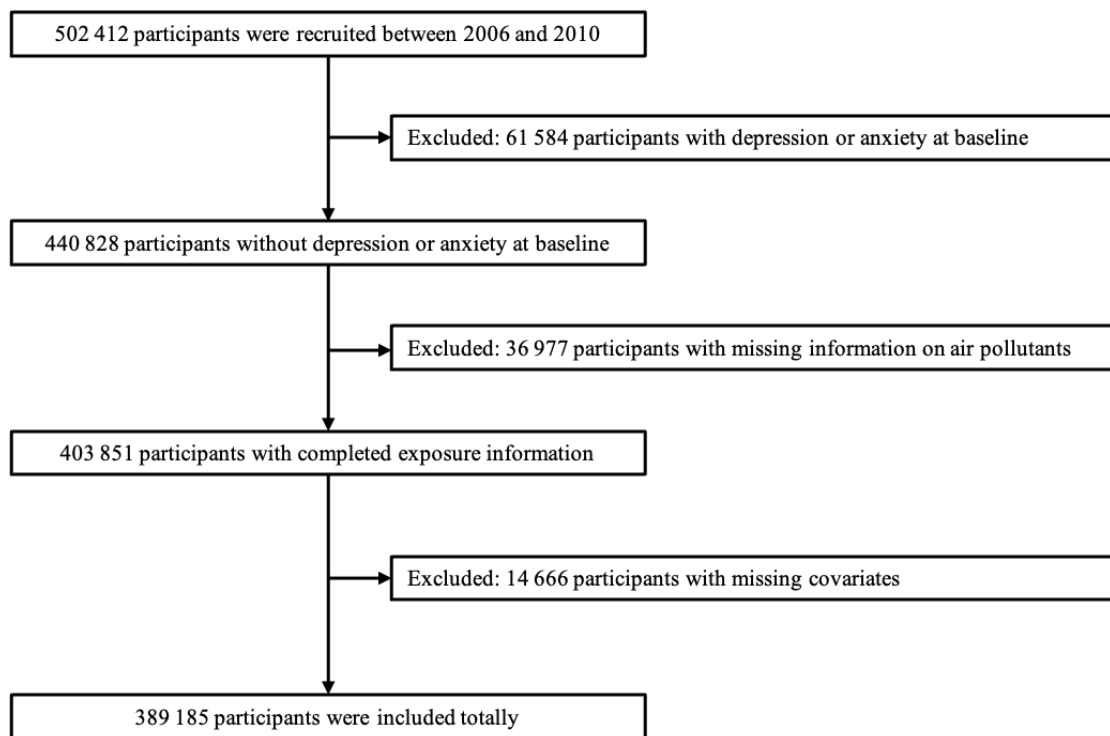

**eFigure 2.** Flow Chart of Participants Included in the Study

(A) depression

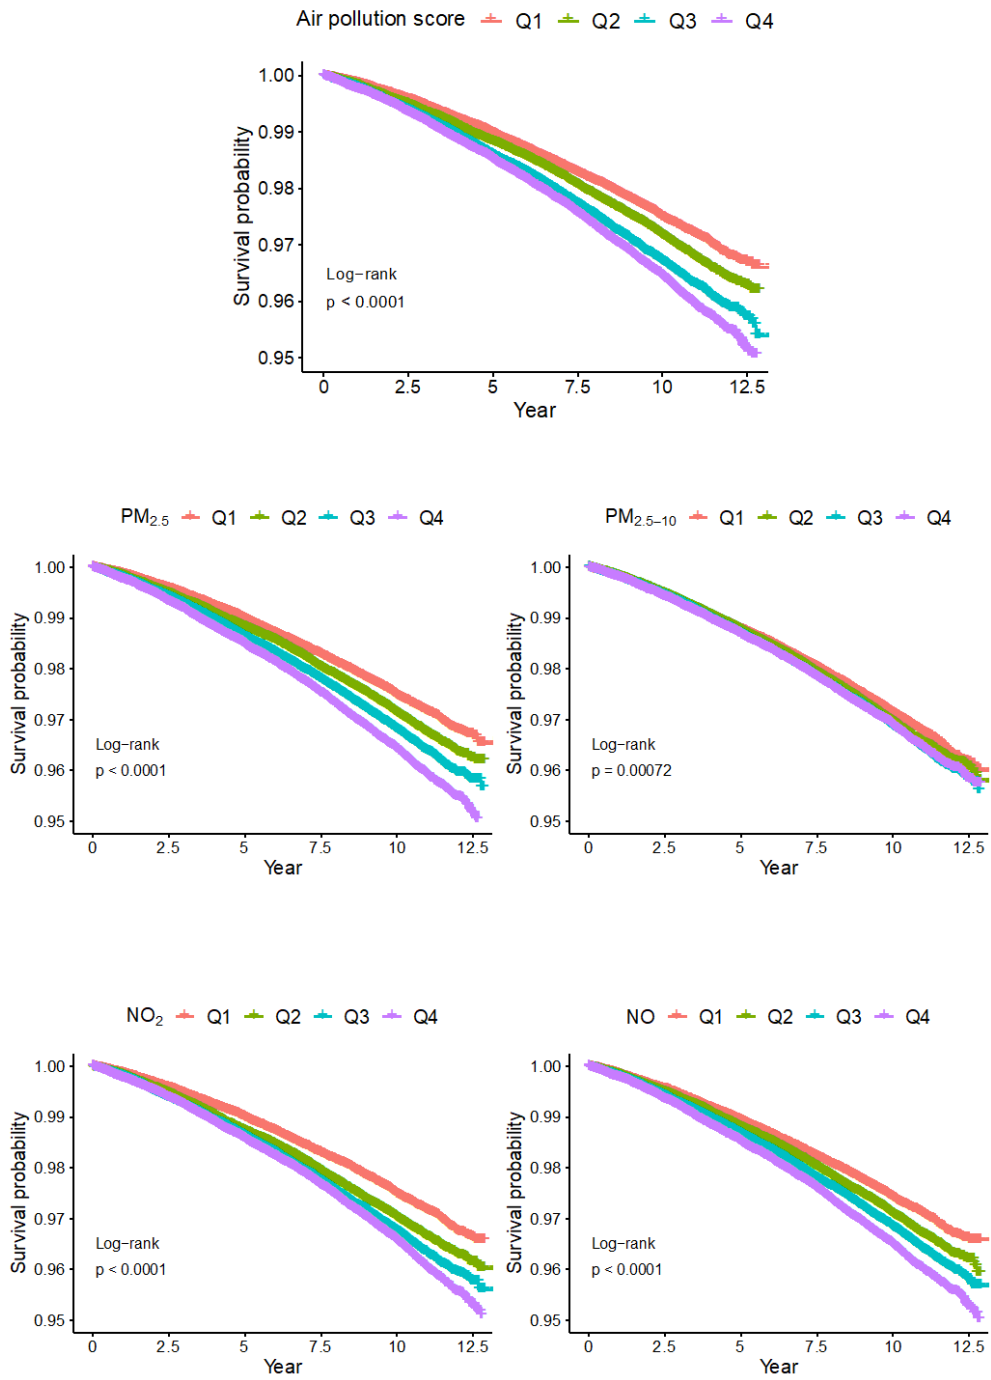

(B) anxiety

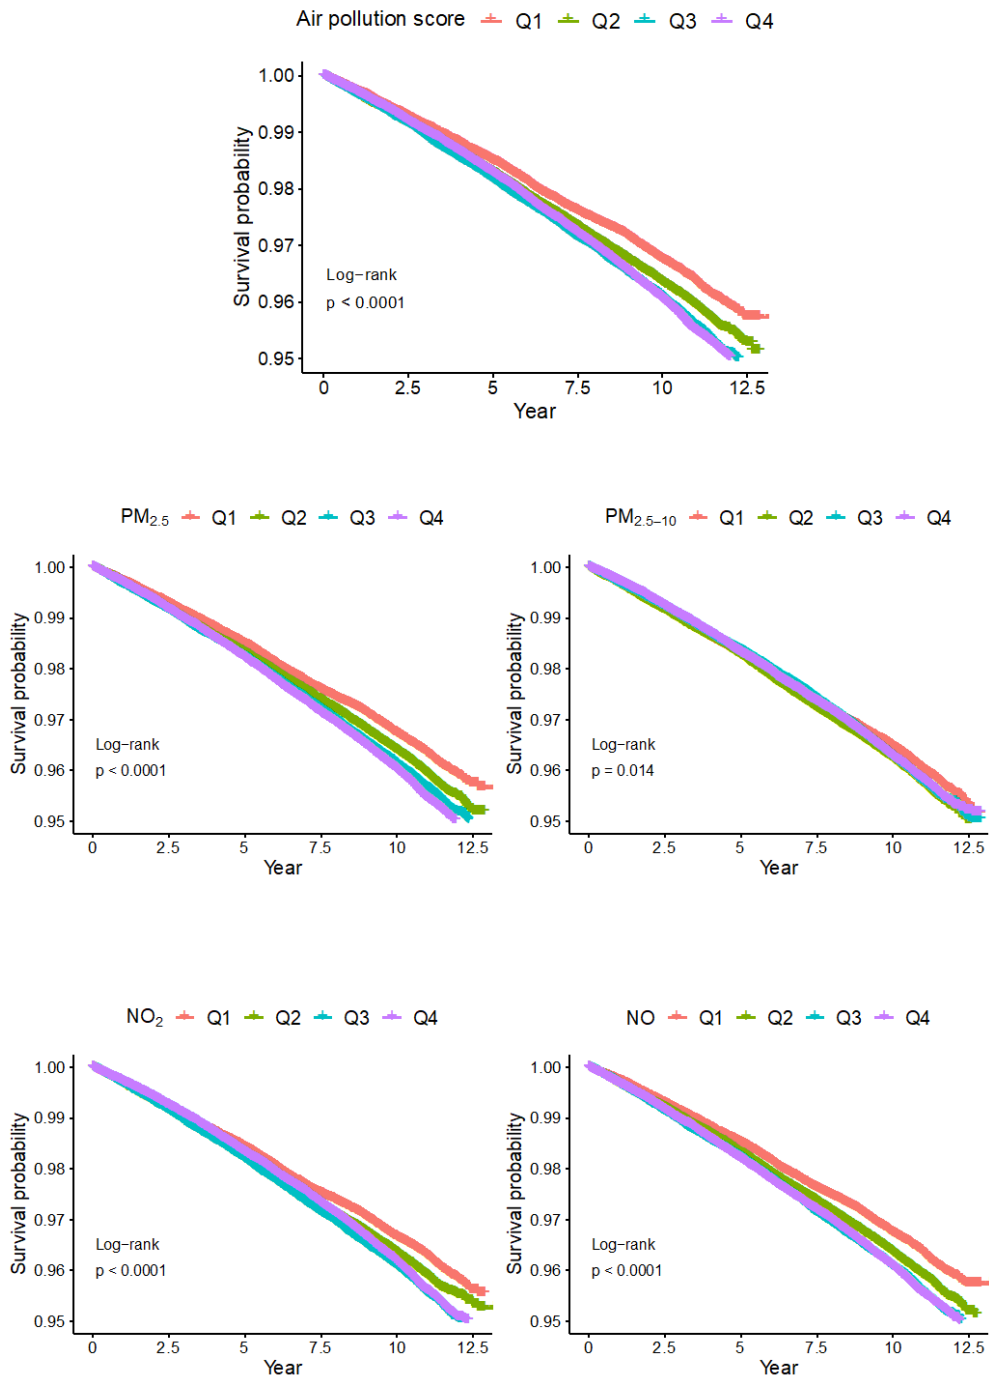

**eFigure 3.** Cumulative Survival Curves for Air Pollutants and Incident Depression (A) and Anxiety (B)
