# Supplementary material
Source: PubMed Central journal article supplement (PMC10077109)
Supplement: jamapsychiatry-e224812-s002.pdf [file jamapsychiatry-e224812-s002.pdf]

## Data Sharing Statement

Yang. Long-term Exposure to Multiple Ambient Air Pollutants and Association With Incident Depression and Anxiety. *JAMA Psychiatry*. Published February 01, 2023.  
doi:10.1001/jamapsychiatry.2022.4812

### Data

**Data available:** No
